# Supplementary material for: Construction and Experimental Validation of a Petri Net Model of Wnt/β-Catenin Signaling
Source: PubMed Central journal article supplement (PMC4878796; doi:10.1371/journal.pone.0155743), 2016-05-24

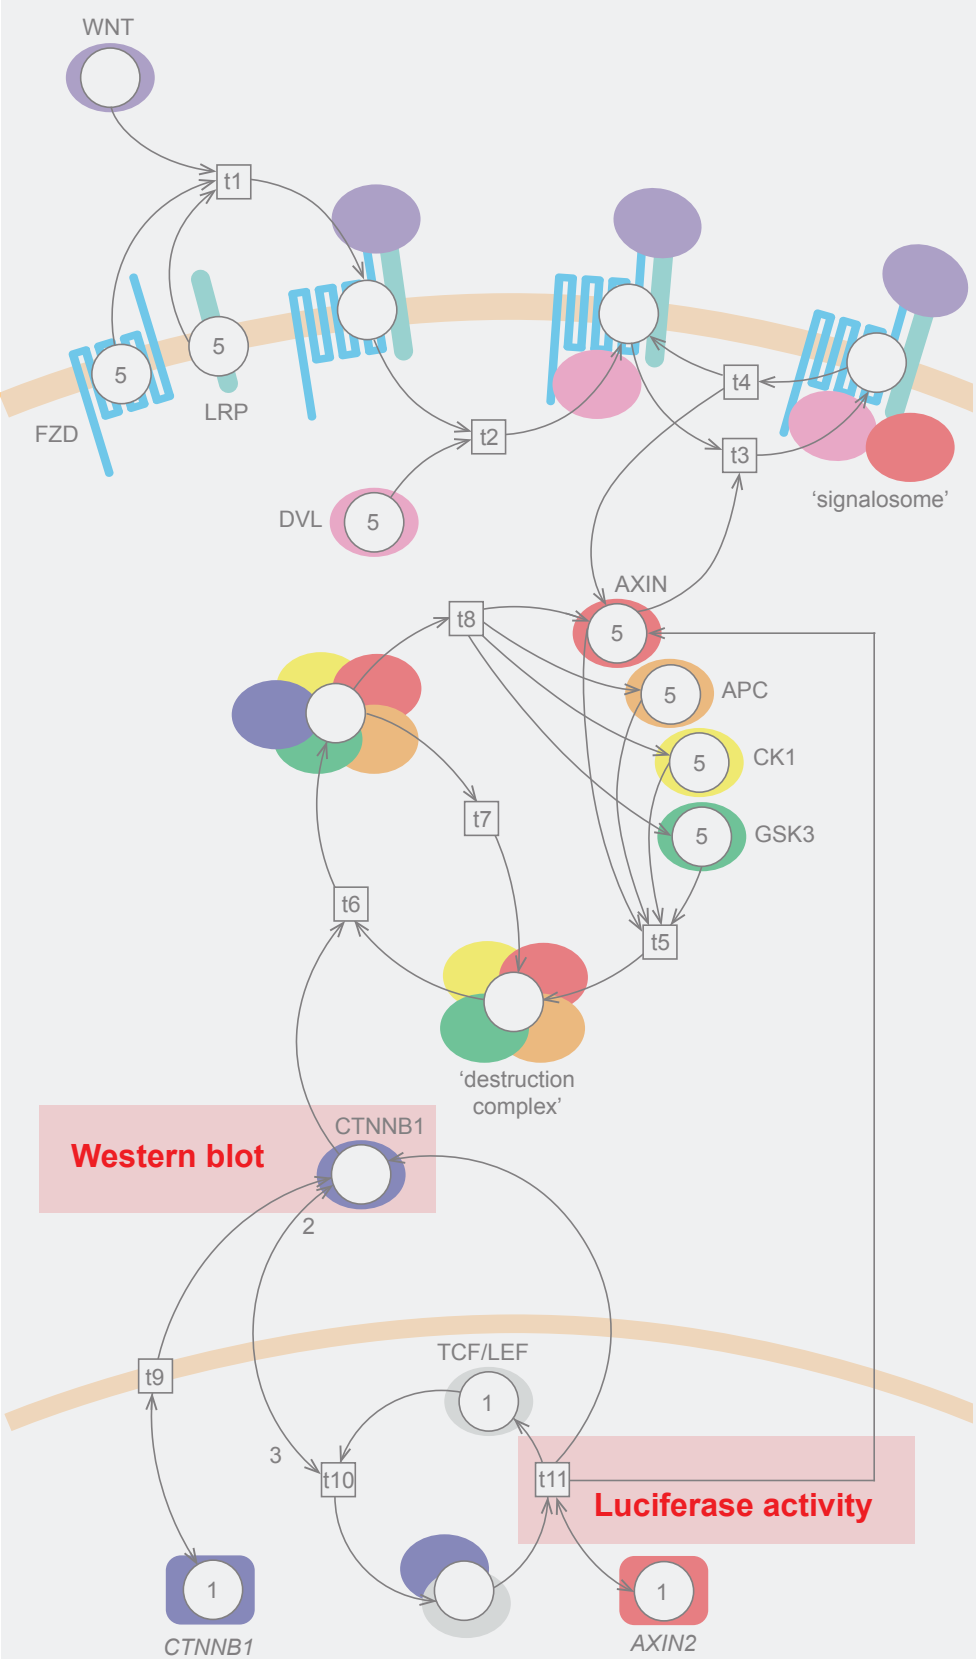

Supplement: pone.0155743.s001.pdf [file pone.0155743.s001.pdf]
